# Supplementary material for: Influence of Climate Warming on Grapevine (<em>Vitis vinifera</em> L.) Phenology in Conditions of Central Europe (Slovakia)
Source: Preprints.org preprint supplement (doi:10.20944/preprints202103.0340.v1), 2021-03-12
Supplement: Supplementary file 1 [file supplementary]

## Sheet: PGS, GDD, HI
Table S1 Bioclimatic indices
Year	Beginning of PGS	JD	End of PGS	JD	Average temperature in PGS	Length of PGS (days)	GDD	HI
1985	31.3.	90	12.10.	285	16.01	196	1216.7	1772
1986	3.4.	93	20.10.	293	16.82	201	1419.7	2082.7
1987	17.4.	106	27.9.	270	17.24	164	1194.3	1813.1
1988	18.4.	109	20.10.	294	16.82	189	1286	1911.8
1989	4.4.	94	2.10.	275	16.39	182	1175.1	1837.2
1990	28.3.	87	21.10.	294	15.55	207	1185.8	1800.8
1991	11.4.	101	18.10.	291	15.78	190	1155.9	1705.3
1992	22.4.	113	11.10.	285	18.21	172	1413.6	2108.3
1993	21.4.	111	25.10.	298	17.24	187	1365.7	1999
1994	21.4.	111	5.10.	278	18.27	167	1382.5	2065.6
1995	18.4.	108	21.10.	294	16.6	186	1237.5	1808.3
1996	4.4.	95	20.10.	294	15.8	199	1194.5	1767.7
1997	25.4.	115	12.10.	285	17.2	170	1225.3	1845.3
1998	1.4.	91	20.10.	293	16.08	202	1254.9	1843.2
1999	25.3.	84	13.10.	286	16.55	202	1343.3	1960.5
2000	12.4.	103	5.11.	279	17.13	207	1504.2	2140
2001	31.3.	90	24.10.	297	16.32	207	1346.1	1891.9
2002	13.4.	103	5.10.	278	17.94	175	1393	2076.6
2003	25.3.	84	12.10.	285	17.54	201	1588	2335.2
2004	18.4.	109	10.10.	284	16.65	175	1167.3	1828.8
2005	11.4.	101	12.10.	285	16.89	184	1282.4	1907.3
2006	15.4.	105	15.10.	288	17.29	183	1334.1	1996.2
2007	9.4.	99	12.10.	285	17.82	186	1465.4	2188.6
2008	24.4.	115	23.10.	295	17.14	182	1314.2	2009.2
2009	31.3.	90	12.10.	285	18.05	195	1571.3	2333.9
2010	24.3.	83	8.10.	281	16.27	198	1273.9	1893.8
2011	31.3.	90	13.10.	286	17.45	196	1476.7	2229.5
2012	22.4.	113	23.10.	297	18.34	184	1548	2346.7
2013	14.4.	104	10.11.	314	16.77	210	1563	2151.4
2014	16.3.	75	24.10.	297	16.16	222	1397.7	1980.3
2015	11.4.	101	20.10.	293	17.87	192	1530.2	2210.6
2016	3.4.	94	5.10.	279	16.91	185	1306.6	2132.2
2017	29.3.	88	23.10.	296	16.13	208	1356.7	2137.4
2018	3.4.	93	5.11.	309	17.51	216	1646.7	2477.5
minimum
maximum
PGS - Principal growing season
JD - Julian days
GDD - Growth degree days
HI - Huglin Index

## Sheet: Monthly, year, season av. temp.
Table S2 Monthly, year, and season temperature averages
Year	I.	II	III.	IV.	V.	VI.	VII.	VIII.	IX.	X.	XI.	XII	Year average	IV.-IX. Average
1985	-6.57	-4.94	4.28	10.39	15.37	16.14	20.06	19.65	15.06	8.96	2.53	2.74	8.73	16.1
1986	-1.36	-3.59	3.6	11.88	17.86	18.38	19.78	20.53	15.45	9.48	4.27	-2.82	9.53	17.3
1987	-5.28	0.23	-0.13	10.33	13.77	18.38	21.69	17.13	16.86	10.8	4.36	0.7	9.11	16.4
1988	1.29	2.06	3.51	9.74	15.97	17.54	21.61	19.43	14.9	9.3	-1.04	0.99	9.64	16.5
1989	-1.7	2.29	7.36	11.84	14.96	16.29	19.78	18.91	15.85	10.26	2.6	-0.52	9.87	16.3
1990	-1.05	3.93	8.1	9.68	15.98	17.18	19.52	20.58	13.17	9.43	4.69	-0.97	10.06	16
1991	-1.42	-3.33	6.5	8.51	12.51	17.41	21.07	18.7	15.67	8.34	4.72	-3.6	8.82	15.6
1992	-0.45	1.89	4.7	10.73	15.35	19.27	20.63	23.62	14.93	8.21	4.22	-1.22	10.18	17.4
1993	-1.03	-2.53	3.55	10.63	18.02	18.61	18.8	20.26	14.38	10.7	1.4	1.59	9.61	16.8
1994	2.17	1.05	7.01	10.56	14.66	18.6	22.77	19.99	16.92	7.79	4.93	0.56	10.64	17.3
1995	-1.86	4.25	4.3	10.21	14.38	17.59	22.14	18.97	13.26	10.38	1.39	-0.5	9.57	16.1
1996	-2.8	-2.81	1.35	11.34	16.32	18.95	18.28	19.25	11.65	9.88	6.29	-3.39	8.72	16
1997	-2.98	0.78	4.35	7.25	16.03	18.69	18.84	19.89	14.75	6.79	4.69	1.83	9.29	15.9
1998	2.01	4.39	3.31	11.34	14.31	19.53	19.9	19.82	14.13	9.88	1.59	-3.48	9.75	16.5
1999	-0.97	-0.19	6.3	11.79	15.22	18.79	20.75	18.39	17.24	9.39	2.95	-0.87	9.95	17
2000	-3.19	2.33	4.87	13.56	16.81	19.92	18.74	21.5	14.63	12.52	7.71	1.59	10.93	17.5
2001	0.02	1.69	5.95	10.34	16.98	17.26	20.72	20.93	13.42	12.46	2.24	-6.11	9.71	16.6
2002	-1.68	3.75	6.56	10.26	17.76	19.78	21.89	20.08	14.25	8.41	6.26	-1.79	10.49	17.3
2003	-3.06	-3.66	4.69	9.82	18.38	21.18	21.63	22.11	15.52	7.1	6.22	0.25	10.09	18.1
2004	-3.73	0.79	4.87	11.57	13.4	17.68	20.17	19.89	14.55	10.96	5.46	0.19	9.67	16.2
2005	-0.75	-2.95	2.79	11.23	15.78	18.52	20.29	18.33	16.1	10.16	3.09	-0.16	9.44	16.7
2006	-3.41	-1.64	3.27	11.65	14.56	18.71	22.14	17.7	17.03	11.31	7.01	1.46	10.04	17
2007	3.69	3.91	7.91	12.37	17.06	20.36	22.2	21.45	13.13	9.45	2.98	-1.46	11.14	17.8
2008	1.09	3.35	5.35	11.19	16.17	20.31	20.11	19.97	14.1	10.75	6.31	2.41	10.94	17
2009	-2.43	0.75	4.65	14.5	16.53	17.81	22.46	21.19	17.4	9.69	6.19	0.56	10.82	18.3
2010	-2.3	0.31	5.05	10.82	15.07	19.25	22.4	19.27	13.31	7.36	7.61	-2.98	9.64	16.7
2011	-1.44	-0.78	5.45	12.65	15.58	19.45	19.63	21.25	17.94	9.51	2.37	0.95	10.27	17.8
2012	0.24	-3.33	6.9	11.5	16.68	20.13	21.89	21.33	17.07	10.16	6.67	-2.5	10.6	18.1
2013	-1.16	1.43	2.82	11.29	15.51	19.07	21.56	21.79	13.71	11.46	6.61	1.19	10.54	17.2
2014	2.1	4.26	9.11	12.14	14.81	19.07	21.37	18.31	16.16	11.21	7.2	2.45	11.55	17
2015	-1.16	0.68	5.46	10.08	15.27	19.6	22.91	22.95	16.53	9.29	5.45	1.83	11	17.9
2016	-2.09	4.67	6.06	11.15	14.88	19.68	20.97	18.57	16.11	8.41	3.44	-2.09	9.98	16.9
2017	-8.67	1.56	7.29	8.84	15.64	20.46	20.49	21.32	14.68	9.06	4.38	-0.13	9.61	16.9
2018	1.72	-0.65	2.93	14.65	18.37	20	20.98	21.62	15.5	11.18	5.95	-0.5	11.04	18.5
minimum
maximum

## Sheet: Monthly average maximum temp.
Table S3 Monthly average maximum temperature
Year	III.	IV.	V.	VI.	VII.	VIII.	IX.	X.
1985	7.94	16.2	21.15	21.15	26.42	26.27	21.84	15.93
1986	8.56	18.12	23.81	24.9	26.07	27.22	23.25	16.64
1987	4.58	15.62	19.01	24.45	28.08	23.47	24.22	15.89
1988	8	16.29	21.87	23.64	28.62	27	21.16	15.65
1989	13.23	17.85	21.44	22.69	26.06	25.29	22.54	16.88
1990	14.85	14.94	22.62	23.61	26.18	28.89	19.64	15.69
1991	11.09	14.57	17.84	23.84	27.34	25.61	22.31	13.59
1992	10.59	17.1	22.05	25.09	27.65	32.47	21.89	12.62
1993	8.97	16.7	25.71	25.17	25.58	28.11	21.29	15.64
1994	12.43	16.27	20.96	24.92	30.37	27.68	23.48	12.87
1995	8.37	15.68	19.88	23.34	29.13	26.64	18.83	17.25
1996	6.15	17.02	22.67	25.79	25.1	25.93	16.3	15.05
1997	10.46	13.04	22.25	24.94	25.14	27.56	22.31	14.2
1998	9.94	16.38	20.35	25.53	26.39	27.17	19.18	13.63
1999	11.37	17.34	21.34	24.47	26.8	24.9	24.28	14.17
2000	9.13	19.47	24.28	27.38	25.08	29.67	21.01	18.64
2001	10.34	15.83	23.72	23.45	27.16	28.6	18.06	17.92
2002	13.03	16.55	24.32	26.35	28.72	26.4	20.85	12.58
2003	11.16	15.85	26.01	28.93	28.65	30.48	23.2	12.07
2004	8.93	16.86	19.71	24.12	26.57	27.35	21.95	16.07
2005	8.48	17.47	22.5	25.14	27.09	24.29	22.27	16.31
2006	8.45	18.04	20.56	25.53	29.99	23.87	24.11	18.42
2007	13.23	20.23	23.94	27.86	30.19	28.68	19.85	15.43
2008	10.51	17.49	23.47	27.13	26.91	27.68	20.86	16.98
2009	9.3	22.29	23.64	24.55	30.2	28.46	25.28	14.74
2010	10.82	17.14	21.1	25.11	29.39	26.1	19.16	13.56
2011	12.3	20.2	23.6	26.3	26.3	29.1	27.1	16.4
2012	15	18.8	24.9	27.6	30	30.2	25.2	16.4
2013	7.2	18.5	22	26.2	29.7	30.1	21.1	18.1
2014	15.5	18.7	21.3	26.2	28.3	24.9	22.1	16.5
2015	11.8	16.9	21.6	25.9	30.4	30.4	22.7	14
2016	12.8	19.4	23.1	28	28.9	27	25.5	13.7
2017	15.48	16.52	24.18	29.34	28.88	30.46	21.57	16.53
2018	8.23	22.51	26.98	27.52	29.5	30.89	24.62	19.41
minimum
maximum
