# Supplementary material for: Influence of Climate Warming on Grapevine (<em>Vitis vinifera</em> L.) Phenology in Conditions of Central Europe (Slovakia)
Source: Preprints.org preprint supplement (doi:10.20944/preprints202103.0340.v1), 2021-03-12
Supplement: Supplementary file 5 [file Phenophases.xlsx]

## Sheet: Pinot Blanc phenophases
Table S4: Pinot Blanc phenophases
Years	Budburst		Beginning of flowering		End of flowering		Veraison		Harvest date		Season budburst to harvest (days)
	Date	JD	Date	JD	Date	JD	Date	JD	Date	JD
1985	16.4.	106	14.6.	165	26.6.	177	2.9.	245	14.10.	287	181
1986	10.4.	100	28.5.	148	11.6.	162	8.8.	220	25.9.	268	168
1987	24.4.	114	19.6.	170	30.6.	181	22.8.	234	8.10.	281	167
1988	18.4.	109	10.6.	162	22.6.	174	19.8.	232	4.10.	278	169
1989	7.4.	97	6.6.	157	20.6.	171	17.8.	229	29.9.	272	175
1990	1.4.	91	6.6.	157	22.6.	173	20.8.	232	05.10.	278	187
1991	11.4.	101	20.6.	171	30.6.	181	23.8.	235	16.10.	289	188
1992	21.4.	112	3.6.	155	14.6.	166	14.8.	227	28.9.	272	160
1993	23.4.	113	27.5.	147	5.6.	156	9.8.	221	27.9.	270	157
1994	13.4.	103	8.6.	159	19.6.	170	17.8.	229	3.10.	276	173
1995	21.4.	111	13.6.	164	22.6.	173	19.8.	231	26.9.	269	158
1996	22.4.	113	2.6.	154	10.6.	162	15.8.	228	30.9.	274	161
1997	28.4.	118	10.6.	161	20.6.	171	19.8.	231	30.9.	273	155
1998	20.4.	110	6.6.	157	17.6.	168	19.8.	231	6.10.	279	169
1999	9.4.	99	4.6.	155	15.6.	166	16.8.	228	7.10.	280	181
2000	17.4.	108	23.5.	144	1.6.	153	2.8.	215	21.9.	265	157
2001	16.4.	106	1.6.	152	13.6.	164	17.8.	229	2.10.	275	169
2002	16.4.	106	28.5.	148	10.6.	161	23.7.	204	17.9.	260	154
2003	20.4.	110	26.5.	146	2.6.	153	28.7.	209	22.9.	265	153
2004	16.4.	107	11.6.	163	22.6.	174	23.8.	236	5.10.	279	174
2005	18.4.	108	5.6.	156	16.6.	167	12.8.	224	5.10.	278	170
2006	19.4.	109	13.6.	164	22.6.	173	19.8.	231	9.10.	282	173
2007	7.4.	97	25.5.	145	5.6.	156	23.7.	204	20.9.	263	166
2008	12.4.	103	2.6.	154	13.6.	165	5.8.	218	7.10.	281	178
2009	8.4.	98	22.5.	142	2.6.	153	1.8.	213	1.10.	274	176
2010	13.4.	103	10.6.	161	20.6.	171	1.8.	213	21.9.	264	161
2011	10.4.	100	30.5.	150	11.6.	162	31.7.	212	21.9.	264	164
2012	16.4.	107	28.5.	149	8.6.	160	31.7.	213	24.9.	268	161
2013	17.4.	107	9.6.	160	19.6.	170	30.7.	211	18.9.	261	154
2014	2.4.	92	5.6.	156	16.6.	167	2.8.	214	18.9.	261	169
2015	13.4.	103	1.6.	152	11.6.	162	2.8.	214	16.9.	259	156
2016	9.4.	100	3.6.	155	15.6.	167	8.8.	220	18.10.	292	192
2017	31.3.	90	31.5.	151	16.6.	167	1.8.	213	18.9.	261	171
2018	14.4.	104	20.5.	140	31.5.	151	20.7.	201	27.9.	270	166
Mean	15.4.	105	4.6.	155	15.6.	166	10.8.	222	30.9.	273	168
Max	28.4.	118	20.6.	171	30.6.	181	2.9.	245	18.10.	292	192
Min	31.3.	90	20.5.	140	31.5.	151	20.7.	201	16.9.	259	153
minimum
maximum
JD - Julian days

## Sheet: Welschriesling phenophases
Table S5: Welschriesling phenophases
Years	Budburst		Beginning of flowering		End of flowering		Veraison		Harvest date		Season budburst to harvest (days)
	Date	JD	Date	JD	Date	JD	Date	JD	Date	JD
1985	23.4.	113	22.6.	173	4.7.	185	9.9.	252	18.10.	291	178
1986	27.4.	117	8.6.	159	17.6.	168	18.8.	230	6.10.	279	162
1987	3.5.	123	26.6.	177	5.7.	186	1.9.	244	16.10.	289	166
1988	26.4.	117	16.6.	168	27.6.	179	30.8.	243	24.10.	298	181
1989	15.4.	105	13.6.	164	27.6.	178	27.8.	239	16.10.	289	184
1990	11.4.	101	15.6.	166	27.6.	178	30.8.	242	23.10.	296	195
1991	17.4.	107	27.6.	178	7.7.	188	3.9.	246	25.10.	298	191
1992	27.4.	118	11.6.	163	21.6.	173	24.8.	237	12.10.	286	168
1993	28.4.	118	2.6.	153	9.6.	160	18.8.	230	1.10.	274	156
1994	19.4.	106	14.6.	163	25.6.	176	24.8.	235	12.10.	285	179
1995	25.4.	115	19.6.	170	28.6.	179	25.8.	237	6.10.	279	164
1996	26.4.	117	7.6.	159	14.6.	166	24.8.	237	14.10.	288	171
1997	2.5.	122	14.6.	165	25.6.	176	26.8.	238	6.10.	279	157
1998	25.4.	115	11.6.	152	23.6.	174	26.8.	238	16.10.	285	170
1999	15.4.	105	10.6.	161	19.6.	170	23.8.	235	18.10.	291	186
2000	21.4.	111	28.5.	149	5.6.	157	9.8.	222	25.9.	269	158
2001	21.4.	112	9.6.	160	20.6.	171	23.8.	235	9.10.	282	170
2002	20.4.	110	4.6.	155	15.6.	166	8.8.	220	16.9.	259	139
2003	22.4.	112	2.6.	153	7.6.	158	28.7.	209	24.9.	267	155
2004	23.4.	113	18.6.	170	28.6.	180	31.8.	244	18.10.	292	178
2005	22.4.	113	15.6.	166	24.6.	175	30.8.	242	17.10.	290	178
2006	21.4.	111	17.6.	168	26.6.	177	23.8.	235	19.10.	292	181
2007	12.4.	102	29.5.	149	9.6.	160	8.8.	220	4.10.	277	175
2008	14.4.	105	8.6.	160	18.6.	170	15.8.	228	27.10.	301	196
2009	12.4.	102	29.5.	149	10.6.	161	14.8.	226	8.10.	281	179
2010	19.4.	109	14.6.	165	24.6.	175	8.8.	220	30.9.	273	164
2011	15.4.	105	4.6.	155	15.6.	166	17.8.	229	13.10.	286	181
2012	19.4.	110	3.6.	155	14.6.	166	13.8.	226	4.10.	278	168
2013	23.4.	113	11.6.	162	22.6.	173	23.8.	235	14.10.	287	174
2014	4.4.	94	11.6.	162	21.6.	172	29.7.	210	29.9.	272	178
2015	14.4.	104	7.6.	158	18.6.	169	12.8.	224	28.9.	271	167
2016	13.4.	104	7.6.	159	18.6.	170	10.8.	223	26.10.	299	196
2017	14.4.	104	5.6.	156	16.6.	167	5.8.	217	18.9.	261	157
2018	13.4.	103	23.5.	143	30.5.	150	28.7.	209	15.10.	288	185
Mean	20.4.	110	10.6.	161	20.6.	171	19.8.	231	10.10.	283	173
Max	3.5.	123	27.6.	178	7.7.	188	9.9.	252	27.10.	301	196
Min	4.4.	94	23.5.	143	30.5.	150	28.7.	209	16.9.	259	139
minimum
maximum
JD - Julian days
